# Supplementary material
Source: PubMed Central journal article supplement (PMC6166268)
Supplement: Supplementary_Data.pdf [file Supplementary_Data.pdf]

Table S1. Clinicopathological characteristics.

| Variable                                      | Cases [n,<br>(% or IQR)] |
|-----------------------------------------------|--------------------------|
| Median age, years (IQR)                       | 65 (61-69)               |
| Overweight, n (%)                             |                          |
| Absence                                       | 430 (68.8)               |
| Presence                                      | 195 (31.2)               |
| Median PSA at diagnosis, ng/ml (IQR)          | 7.1 (5.3-10.0)           |
| Median prostate volume at diagnosis, ml (IQR) | 26 (20-34)               |
| Clinical stage, n (%)                         |                          |
| cT1                                           | 192 (30.7)               |
| cT2                                           | 394 (63.0)               |
| cT3/4                                         | 39 (6.2)                 |
| Biopsy gleason score, n (%)                   |                          |
| <7                                            | 160 (25.6)               |
| 7                                             | 323 (51.7)               |
| >7                                            | 142 (22.7)               |
| Nerve sparing, n (%)                          |                          |
| None                                          | 384 (61.4)               |
| Ipsilateral                                   | 126 (20.2)               |
| Bilateral                                     | 115 (18.4)               |
| Lympho-node dissection, n (%)                 |                          |
| No procedure                                  | 401 (64.2)               |
| Underwent procedure                           | 224 (35.8)               |
| Pathological stage, n (%)                     |                          |
| pT0                                           | 8 (1.3)                  |
| pT2                                           | 438 (70.1)               |
| pT3a                                          | 145 (23.2)               |
| pT3b                                          | 34 (5.4)                 |
| Surgical margin, n (%)                        |                          |
| Negative                                      | 478 (77.5)               |
| Positive                                      | 139 (22.5)               |
| Undetermined                                  | 8                        |
| Pathological Gleason score, n (%)             |                          |
| <7                                            | 53 (9.2)                 |
| 7                                             | 430 (74.9)               |
| >7                                            | 91 (15.9)                |
| Undetermined                                  | 51                       |
| Changes in Gleason score, n (%)               |                          |
| Downgrade                                     | 72 (11.5)                |
| No change                                     | 353 (56.5)               |
| Upgrade                                       | 149 (23.8)               |
| Undetermined                                  | 51                       |
| Lympho-node status, n (%)                     |                          |
| Negative                                      | 190 (84.8)               |
| Positive                                      | 34 (15.2)                |

IQR, interquartile range; PSA, prostate-specific antigen.

Table S2. Perioperative outcomes in robot-assisted radical prostatectomy.

| Variable                                   | Cases, n<br>(IQR or %)  |
|--------------------------------------------|-------------------------|
| Median total operation time, min (IQR)     | 235 (199-289)           |
| Median console-operation time, min (IQR)   | 177 (144-234)           |
| Median estimated blood loss, ml (IQR)      | 200 (100-350)           |
| Median catheterization duration, day (IQR) | 6 (5-7)                 |
| Perioperative comorbidity, n (%)           |                         |
| Any grade/grade $\geq$ 3                   | 100 (16.0)/<br>13 (2.1) |

IQR, interquartile range.
